# Supplementary material
Source: PubMed Central journal article supplement (PMC9258748)
Supplement: NEJMc2206576_appendix.pdf [file NEJMc2206576_appendix.pdf]

## Supplementary Appendix

Supplement to: Hachmann NP, Miller J, Collier AY, et al. Neutralization escape by SARS-CoV-2 omicron subvariants BA.2.12.1, BA.4, and BA.5. *N Engl J Med*. DOI: 10.1056/NEJMc2206576

This appendix has been provided by the authors to give readers additional information about the work.

## Supplementary Appendix

### CONTENTS

|                                                 |   |
|-------------------------------------------------|---|
| Supplementary Methods .....                     | 3 |
| Table S1. Study Population .....                | 5 |
| Table S2. SARS-CoV-2 Infected Participants..... | 6 |

## **Neutralization Escape by the SARS-CoV-2 Omicron Variants BA.2.12.1 and BA.4/BA.5**

Nicole P. Hachmann, B.S.<sup>1</sup>, Jessica Miller, B.S.<sup>1</sup>, Ai-ris Y. Collier, M.D.<sup>1</sup>, John D. Ventura, Ph.D.<sup>1</sup>, Jingyou Yu, Ph.D.<sup>1</sup>, Marjorie Rowe, B.S.<sup>1</sup>, Esther Apraku Bondzie, M.S.N.<sup>1</sup>, Olivia Powers, B.S.<sup>1</sup>, Nehalee Surve, M.S.<sup>1</sup>, Kevin Hall, B.S.<sup>1</sup>, and Dan H. Barouch, M.D., Ph.D.<sup>1\*</sup>

<sup>1</sup>Beth Israel Deaconess Medical Center, Boston, MA, USA

\*Corresponding author: Dan H. Barouch, M.D., Ph.D., Center for Virology and Vaccine Research, 330 Brookline Avenue, E/CLS-1043, Boston, MA 02115; Telephone: 617-735-4485;

Fax: 617-735-4566; Email: [dbarouch@bidmc.harvard.edu](mailto:dbarouch@bidmc.harvard.edu)

### **Authors for Print Edition**

Nicole P. Hachmann, B.S., Jessica Miller, B.S., and Dan H. Barouch, M.D., Ph.D.; Center for Virology and Vaccine Research, Beth Israel Deaconess Medical Center, Boston, MA, USA

## Supplementary Methods

### *Study population*

A specimen biorepository at Beth Israel Deaconess Medical Center (BIDMC) obtained convenience samples from individuals who received a SARS-CoV-2 vaccine and/or had a history of SARS-CoV-2 infection. The BIDMC institutional review board approved this study (2020P000361). All participants provided informed consent. For the group of individuals receiving three doses of BNT162b2, participants were excluded if they had a history of SARS-CoV-2 infection or a positive nucleocapsid (N) serology by electrochemiluminescence assays (ECLA), or if they received other COVID-19 vaccines or immunosuppressive medications. For the infection cohort, the infecting strain was presumed based on the predominant circulating variant at the time of infection.

### *Pseudovirus neutralizing antibody assay*

The SARS-CoV-2 pseudoviruses expressing a luciferase reporter gene were used to measure pseudovirus neutralizing antibodies. In brief, the packaging construct psPAX2 (AIDS Resource and Reagent Program), luciferase reporter plasmid pLenti-CMV Puro-Luc (Addgene) and spike protein expressing pcDNA3.1-SARS-CoV-2 S $\Delta$ CT were co-transfected into HEK293T cells (ATCC CRL\_3216) with lipofectamine 2000 (ThermoFisher Scientific). Pseudoviruses of SARS-CoV-2 variants were generated by using WA1/2020 strain (Wuhan/WIV04/2019, GISAID accession ID: EPI\_ISL\_402124), Omicron B.1.1.529 BA.1 (GISAID ID: EPI\_ISL\_7358094.2), or BA.2 (GISAID ID: EPI\_ISL\_6795834.2), BA.2.12.1 (GISAID ID: EPI\_ISL\_12003853.1), and BA.4/BA.5 (GISAID ID: EPI\_ISL\_12268495.2). The supernatants containing the pseudotype

viruses were collected 48h after transfection; pseudotype viruses were purified by filtration with 0.45- $\mu$ m filter. To determine the neutralization activity of human serum, HEK293T-hACE2 cells were seeded in 96-well tissue culture plates at a density of  $2 \times 10^4$  cells per well overnight. Three-fold serial dilutions of heat-inactivated serum samples were prepared and mixed with 50  $\mu$ l of pseudovirus. The mixture was incubated at 37 °C for 1 h before adding to HEK293T-hACE2 cells. After 48 h, cells were lysed in Steady-Glo Luciferase Assay (Promega) according to the manufacturer's instructions. SARS-CoV-2 neutralization titers were defined as the sample dilution at which a 50% reduction (NT50) in relative light units was observed relative to the average of the virus control wells.

**Table S1. Study Population**

|                                                                       | <b>BNT162b2</b><br>N=27 | <b>Omicron infection</b><br>N=27 |
|-----------------------------------------------------------------------|-------------------------|----------------------------------|
| <b>Age (years), median (range)</b>                                    | 35 (23-76)              | 34 (27-41)                       |
| <b>Sex at birth, female</b>                                           | 24 (89)                 | 21 (78)                          |
| <b>Race</b>                                                           |                         |                                  |
| White                                                                 | 23 (85)                 | 21 (78)                          |
| Asian                                                                 | 2 (7)                   | 1 (4)                            |
| Black                                                                 | 1 (4)                   | 2 (7)                            |
| More than one race                                                    | 1 (4)                   | 0                                |
| Unknown/Other*                                                        | 0 (0)                   | 3 (11)                           |
| <b>Ethnicity</b>                                                      |                         |                                  |
| Hispanic or Latino                                                    | 2 (7)                   | 1 (4)                            |
| Non-Hispanic                                                          | 24 (89)                 | 24 (89)                          |
| Other                                                                 | 1 (4)                   | 2 (7)                            |
| <b>Medical condition</b>                                              |                         |                                  |
| Obese (BMI $\geq$ 30 kg/m <sup>2</sup> )                              | 2 (7)                   | 2 (7)                            |
| Hypertension                                                          | 3 (11)                  | 4 (15)                           |
| Diabetes                                                              | 2 (7)                   | 3 (11)                           |
| Pregnant                                                              | 2 (7)                   | 7 (26)                           |
| Lactating                                                             | 4 (15)                  | 3 (11)                           |
| Asthma                                                                | 0                       | 3 (11)                           |
| <b>COVID-19 vaccination history</b>                                   |                         |                                  |
| BNT162b2 (3 doses)                                                    | 27 (100)                | 8 (30)                           |
| BNT162b2 (2 doses)/mRNA-1273 (1 dose)                                 | 0                       | 2 (7)                            |
| mRNA-1273 (3 doses)                                                   | 0                       | 7 (26)                           |
| mRNA-1273 (2 doses)/BNT-1273 (1 dose)                                 | 0                       | 2 (7)                            |
| mRNA-1273 (2 doses)/Ad26.COV2.S (1 dose)                              | 0                       | 1 (4)                            |
| BNT162b2 (2 doses)                                                    | 0                       | 4 (15)                           |
| Ad26.COV2.S (1 dose)/mRNA-1273 (1 dose)                               | 0                       | 1 (4)                            |
| Ad5/Ad26 (2 doses)/mRNA-1273 (1 dose)                                 | 0                       | 1 (4)                            |
| Unvaccinated                                                          | 0                       | 1 (4)                            |
| <b>COVID-19 disease severity (NIH scale)</b>                          |                         |                                  |
| Asymptomatic                                                          | N/A                     | 1 (4)                            |
| Mild                                                                  | N/A                     | 24 (89)                          |
| Moderate                                                              | N/A                     | 0                                |
| Severe                                                                | N/A                     | 2 (7)                            |
| Critical                                                              | N/A                     | 0                                |
| <b>Days from last vaccine dose to positive PCR test, median (IQR)</b> | N/A                     | 83 (37-153)                      |
| <b>Days from positive PCR test to sampling, median (IQR)</b>          | N/A                     | 29 (14-74)                       |

Data displayed as median (range or interquartile range, IQR) and n (%). BMI, body mass index; NIH, National Institutes of Health; PCR, polymerase chain reaction; pregnant designation reflects time of sampling. \*Self-identified race as Jamaican, Brazilian, and Colombian.

**Table S2. SARS-CoV-2 Infected Participants**

| ID | Dominant variant* | Age | Sex at birth | Medical history   | COVID-19 vaccine history (primary/boost) | Days from boost or last dose to PCR | Days from PCR to sampling | COVID-19 NIH disease severity |
|----|-------------------|-----|--------------|-------------------|------------------------------------------|-------------------------------------|---------------------------|-------------------------------|
| 1  | BA.1              | 32  | F            |                   | BNT162b2                                 | 69                                  | 106                       | mild                          |
| 2  | BA.1              | 42  | M            |                   | BNT162b2/<br>mRNA-1273                   | 26                                  | 81                        | mild                          |
| 3  | BA.1              | 42  | M            | Asthma            | BNT162b2/<br>mRNA-1273                   | 40                                  | 74                        | mild                          |
| 4  | BA.1              | 30  | F            | Pregnant          | mRNA-1273/<br>mRNA-1273                  | 59                                  | 52, 102                   | mild                          |
| 5  | BA.1              | 31  | F            |                   | mRNA-1273/<br>mRNA-1273                  | 67                                  | 13, 113                   | mild                          |
| 6  | BA.1              | 35  | F            | Pregnant          | mRNA-1273/<br>mRNA-1273                  | 21                                  | 12                        | mild                          |
| 7  | BA.1              | 59  | F            | HTN               | BNT162b2/<br>BNT162b2                    | 88                                  | 25, 109                   | mild                          |
| 8  | BA.1              | 35  | F            | Pregnant, Obesity | BNT162b2                                 | 287                                 | 17                        | mild                          |
| 9  | BA.1              | 39  | M            | Obesity           | Ad26.COV2.S/<br>mRNA-1273                | 11                                  | 15, 102                   | mild                          |
| 10 | BA.1              | 24  | F            |                   | BNT162b2/<br>BNT162b2                    | 99                                  | 22                        | mild                          |
| 11 | BA.1              | 23  | F            |                   | mRNA-1273/<br>Ad26.COV2.S                | 67                                  | 51, 94                    | mild                          |
| 12 | BA.1              | 50  | F            | DM, HTN           | mRNA-1273/<br>mRNA-1273                  | 6                                   | 8                         | asymptomatic                  |
| 13 | BA.1              | 59  | M            | DM                | BNT162b2                                 | 210                                 | 9                         | severe                        |
| 14 | BA.1              | 22  | F            | Pregnant          | Unvaccinated                             | N/A                                 | 4                         | severe                        |
| 15 | BA.1              | 35  | F            | Pregnant          | mRNA-1273/<br>mRNA-1273                  | 77                                  | 35                        | mild                          |
| 16 | BA.1              | 33  | F            | Pregnant          | BNT162b2                                 | 228                                 | 2                         | mild                          |
| 17 | BA.1              | 27  | M            | Asthma            | BNT162b2/<br>BNT162b2                    | 101                                 | 13, 71                    | mild                          |
| 18 | BA.1              | 29  | F            | Asthma            | mRNA-1273/<br>BNT162b2                   | 15                                  | 14                        | mild                          |
| 19 | BA.1              | 50  | F            |                   | mRNA-1273/<br>mRNA-1273                  | 11                                  | 33                        | mild                          |
| 20 | BA.1              | 34  | F            | Lactating         | BNT162b2/<br>BNT162b2                    | 116                                 | 10, 54                    | mild                          |
| 21 | BA.1              | 34  | F            |                   | mRNA-1273/<br>BNT162b2                   | 42                                  | 16, 29, 91                | mild                          |
| 22 | BA.1              | 32  | F            | Lactating, HTN    | BNT162b2/<br>BNT162b2                    | 102                                 | 18, 74                    | mild                          |
| 23 | BA.1              | 25  | F            | Pregnant          | Sputnik V<br>(Ad5/Ad26)/<br>mRNA-1273    | 239                                 | 32                        | mild                          |
| 24 | BA.1              | 36  | F            | Lactating         | BNT162b2/<br>BNT162b2                    | 113                                 | 41                        | mild                          |
| 25 | BA.1              | 25  | F            | DM                | BNT162b2/<br>BNT162b2                    | 164                                 | 12                        | mild                          |
| 26 | BA.2              | 41  | M            | HTN               | BNT162b2/<br>BNT162b2                    | 169                                 | 16                        | mild                          |
| 27 | BA.2              | 24  | F            |                   | mRNA-1273/<br>mRNA-1273                  | 149                                 | 16                        | mild                          |

\* >50% of sequences in New England (Region 1) according to CDC; PCR, polymerase chain reaction for SARS-CoV-2; NIH, National Institutes of Health; HTN, hypertension; DM, diabetes mellitus.
