# Supplementary material
Source: PubMed Central journal article supplement (PMC9258748)
Supplement: NEJMc2206576_disclosures.pdf [file NEJMc2206576_disclosures.pdf]

**Disclosure Purpose:** 22-06576

### Summary of Interests

I do not have any interests to disclose at this time.

### Additional Questions:

- Are there other relationships or activities that readers could perceive to have influenced, or that give the appearance of potentially influencing, what you wrote in the submitted work?**  
No.
- What is the manuscript title?**  
Neutralization Escape by the SARS-CoV-2 Omicron Variants BA.2.12.1 and BA.4/BA.5
- Are you the corresponding author?**  
No.

### Certification

I certify that the information provided in this disclosure is complete and accurate.

Disclosure Purpose: 22-06576

## Summary of Interests

### Company or Organization

| Entity                                                                                                                         | Type             | Interest Held By                                                                |
|--------------------------------------------------------------------------------------------------------------------------------|------------------|---------------------------------------------------------------------------------|
| <a href="#">Alkermes, Inc.</a>                                                                                                 | Grant / Contract | Self                                                                            |
| <i>Recipient Name:</i> Dan Barouch<br><i>Grant / Contract Description:</i> contract research<br><i>Additional Information:</i> |                  | <i>Recipient Type:</i> Institution<br><i>Grant / Contract Purpose:</i> Research |
| <a href="#">Avidea</a>                                                                                                         | Consultant       | Self                                                                            |
| <i>Category:</i> Consultant<br><i>Additional Information:</i>                                                                  |                  | <i>Description:</i>                                                             |
| <a href="#">BARDA</a>                                                                                                          | Grant / Contract | Self                                                                            |
| <i>Recipient Name:</i> Dan Barouch<br><i>Grant / Contract Description:</i> contract research<br><i>Additional Information:</i> |                  | <i>Recipient Type:</i> Institution<br><i>Grant / Contract Purpose:</i> Research |
| <a href="#">Bill and Melinda Gates Foundation</a>                                                                              | Grant / Contract | Self                                                                            |
| <i>Recipient Name:</i> Dan Barouch<br><i>Grant / Contract Description:</i> academic research<br><i>Additional Information:</i> |                  | <i>Recipient Type:</i> Institution<br><i>Grant / Contract Purpose:</i> Research |
| <a href="#">Celsion</a>                                                                                                        | Consultant       | Self                                                                            |
| <i>Category:</i> Consultant<br><i>Additional Information:</i>                                                                  |                  | <i>Description:</i> consultant                                                  |
| <a href="#">CureVac</a>                                                                                                        | Grant / Contract | Self                                                                            |
| <i>Recipient Name:</i> Dan Barouch<br><i>Grant / Contract Description:</i> contract research<br><i>Additional Information:</i> |                  | <i>Recipient Type:</i> Institution<br><i>Grant / Contract Purpose:</i> Research |
| <a href="#">DARPA</a>                                                                                                          | Grant / Contract | Self                                                                            |
| <i>Recipient Name:</i> Dan Barouch<br><i>Grant / Contract Description:</i> academic research<br><i>Additional Information:</i> |                  | <i>Recipient Type:</i> Institution<br><i>Grant / Contract Purpose:</i> Research |
| <a href="#">Gilead Sciences</a>                                                                                                | Grant / Contract | Self                                                                            |
| <i>Recipient Name:</i> Dan Barouch<br><i>Grant / Contract Description:</i> contract research<br><i>Additional Information:</i> |                  | <i>Recipient Type:</i> Institution<br><i>Grant / Contract Purpose:</i> Research |
| <a href="#">Henry Jackson Foundation</a>                                                                                       | Grant / Contract | Self                                                                            |
| <i>Recipient Name:</i> Dan Barouch<br><i>Grant / Contract Description:</i> academic research<br><i>Additional Information:</i> |                  | <i>Recipient Type:</i> Institution<br><i>Grant / Contract Purpose:</i> Research |
| <a href="#">Intima Biosciences</a>                                                                                             | Grant / Contract | Self                                                                            |
| <i>Recipient Name:</i> Dan Barouch<br><i>Grant / Contract Description:</i> contract research<br><i>Additional Information:</i> |                  | <i>Recipient Type:</i> Institution<br><i>Grant / Contract Purpose:</i> Research |
| <a href="#">Janssen Research and Development</a>                                                                               | Grant / Contract | Self                                                                            |
| <i>Recipient Name:</i> Dan Barouch<br><i>Grant / Contract Description:</i> contract research<br><i>Additional Information:</i> |                  | <i>Recipient Type:</i> Institution<br><i>Grant / Contract Purpose:</i> Research |
| <a href="#">Laronde</a>                                                                                                        | Consultant       | Self                                                                            |
| <i>Category:</i> Consultant<br><i>Additional Information:</i>                                                                  |                  | <i>Description:</i>                                                             |

|                                                                                                                                 |                  |      |
|---------------------------------------------------------------------------------------------------------------------------------|------------------|------|
| <b>Legend Biotech</b>                                                                                                           | Grant / Contract | Self |
| <i>Recipient Name:</i> Dan Barouch<br><i>Grant / Contract Description:</i> contract research<br><i>Additional Information:</i>  |                  |      |
| <i>Recipient Type:</i> Institution<br><i>Grant / Contract Purpose:</i> Research                                                 |                  |      |
| <b>Massachusetts Consortium on Pathogen Readiness (MassCPR)</b>                                                                 | Grant / Contract | Self |
| <i>Recipient Name:</i> Dan Barouch<br><i>Grant / Contract Description:</i> academic research<br><i>Additional Information:</i>  |                  |      |
| <i>Recipient Type:</i> Institution<br><i>Grant / Contract Purpose:</i> Research                                                 |                  |      |
| <b>Meissa</b>                                                                                                                   | Consultant       | Self |
| <i>Category:</i> Consultant<br><i>Additional Information:</i>                                                                   |                  |      |
| <i>Description:</i>                                                                                                             |                  |      |
| <b>MRC</b>                                                                                                                      | Grant / Contract | Self |
| <i>Recipient Name:</i> Dan Barouch<br><i>Grant / Contract Description:</i> academic research<br><i>Additional Information:</i>  |                  |      |
| <i>Recipient Type:</i> Institution<br><i>Grant / Contract Purpose:</i> Research                                                 |                  |      |
| <b>Musk Foundation</b>                                                                                                          | Grant / Contract | Self |
| <i>Recipient Name:</i> Dan Barouch<br><i>Grant / Contract Description:</i> academic research<br><i>Additional Information:</i>  |                  |      |
| <i>Recipient Type:</i> Institution<br><i>Grant / Contract Purpose:</i> Research                                                 |                  |      |
| <b>NIH</b>                                                                                                                      | Grant / Contract | Self |
| <i>Recipient Name:</i> Dan Barouch<br><i>Grant / Contract Description:</i> academic research<br><i>Additional Information:</i>  |                  |      |
| <i>Recipient Type:</i> Institution<br><i>Grant / Contract Purpose:</i> Research                                                 |                  |      |
| <b>Pfizer</b>                                                                                                                   | Consultant       | Self |
| <i>Category:</i> Consultant<br><i>Additional Information:</i>                                                                   |                  |      |
| <i>Description:</i> consultant                                                                                                  |                  |      |
| <b>Pharm-Olam</b>                                                                                                               | Grant / Contract | Self |
| <i>Recipient Name:</i><br><i>Grant / Contract Description:</i><br><i>Additional Information:</i>                                |                  |      |
| <i>Recipient Type:</i><br><i>Grant / Contract Purpose:</i>                                                                      |                  |      |
| <b>Ragon Institute</b>                                                                                                          | Grant / Contract | Self |
| <i>Recipient Name:</i> Dan Barouch<br><i>Grant / Contract Description:</i> academic research<br><i>Additional Information:</i>  |                  |      |
| <i>Recipient Type:</i> Institution<br><i>Grant / Contract Purpose:</i> Research                                                 |                  |      |
| <b>Regeneron Pharmaceuticals</b>                                                                                                | Grant / Contract | Self |
| <i>Recipient Name:</i> Dan Barouch<br><i>Grant / Contract Description:</i> manuscript support<br><i>Additional Information:</i> |                  |      |
| <i>Recipient Type:</i> Institution<br><i>Grant / Contract Purpose:</i> Other - manuscript support                               |                  |      |
| <b>SANOVI PASTEUR INC.</b>                                                                                                      | Grant / Contract | Self |
| <i>Recipient Name:</i> Dan Barouch<br><i>Grant / Contract Description:</i> contract research<br><i>Additional Information:</i>  |                  |      |
| <i>Recipient Type:</i> Institution<br><i>Grant / Contract Purpose:</i> Research                                                 |                  |      |
| <b>SQZ Biotech</b>                                                                                                              | Consultant       | Self |
| <i>Category:</i> Consultant<br><i>Additional Information:</i>                                                                   |                  |      |
| <i>Description:</i> consultant                                                                                                  |                  |      |
| <b>Vector Sciences</b>                                                                                                          | Stock            | Self |
| <i>Additional Information:</i>                                                                                                  |                  |      |
| <b>Zentalis</b>                                                                                                                 | Grant / Contract | Self |
| <i>Recipient Name:</i> Dan Barouch<br><i>Grant / Contract Description:</i> contract research<br><i>Additional Information:</i>  |                  |      |
| <i>Recipient Type:</i> Institution<br><i>Grant / Contract Purpose:</i> Research                                                 |                  |      |

## Intellectual Property

| Type                                                          | Is Licensed | Interest Held By |
|---------------------------------------------------------------|-------------|------------------|
| Patent - COMPOSITIONS AND METHODS FOR TREATING CORONAVIRU ... | Yes         | Self             |

Description: COMPOSITIONS AND METHODS FOR TREATING CORONAVIRUS INFECTION

Patent Status: Provisional

Filing Jurisdiction: USA

Licensees:

| Licensee                         | Title | Date |
|----------------------------------|-------|------|
| Janssen Research and Development |       |      |

Patent Number: 3,101,131

Patent Holder: Current Institution

Additional Information:

Patent - COMPOSITIONS AND METHODS FOR TREATING CORONAVIRU ...

Yes

Self

Description: COMPOSITIONS AND METHODS FOR TREATING CORONAVIRUS INFECTION

Patent Status: Provisional

Filing Jurisdiction: USA

Licensees:

| Licensee                         | Title | Date |
|----------------------------------|-------|------|
| Janssen Research and Development |       |      |

Patent Number: 63/135,182

Patent Holder: Current Institution

Additional Information:

Patent - COMPOSITIONS AND METHODS FOR TREATING CORONAVIRU ...

Yes

Self

Description: COMPOSITIONS AND METHODS FOR TREATING CORONAVIRUS INFECTION

Patent Status: Provisional

Filing Jurisdiction: USA

Licensees:

| Licensee                         | Title | Date |
|----------------------------------|-------|------|
| Janssen Research and Development |       |      |

Patent Number: 63/121,482

Patent Holder: Current Institution

Additional Information:

Patent - COMPOSITIONS AND METHODS FOR TREATING CORONAVIRU ...

Yes

Self

Description: COMPOSITIONS AND METHODS FOR TREATING CORONAVIRUS INFECTION

Patent Status: Provisional

Filing Jurisdiction: USA

Licensees:

| Licensee                         | Title | Date |
|----------------------------------|-------|------|
| Janssen Research and Development |       |      |

Patent Number: 63/133,969

Patent Holder: Current Institution

Additional Information:

#### Additional Questions:

1. Are there other relationships or activities that readers could perceive to have influenced, or that give the appearance of potentially influencing, what you wrote in the submitted work?

No.

2. What is the manuscript title?

Neutralization Escape by the SARS-CoV-2 Omicron Variants BA.2.12.1 and BA.4/BA.5

3. Are you the corresponding author?

Yes.

- a. Please list the other authors' names here.

Nicole P. Hachmann, B.S., Jessica Miller, B.S., Ai-ris Y. Collier, M.D., John D. Ventura, Ph.D., Jingyou Yu, Ph.D., Marjorie Rowe, B.S., Esther Apraku Bondzie, M.S.N., Olivia Powers, B.S., Nehalee Surve, M.S., Kevin Hall, B.S.

#### Certification

I certify that the information provided in this disclosure is complete and accurate.

Disclosure Purpose: 22-06576

## Summary of Interests

### Company or Organization

| Entity                                                                                                                                                                               | Type             | Interest Held By                                                                |
|--------------------------------------------------------------------------------------------------------------------------------------------------------------------------------------|------------------|---------------------------------------------------------------------------------|
| <a href="#">Burroughs Wellcome Fund</a>                                                                                                                                              | Grant / Contract | Self                                                                            |
| <i>Recipient Name:</i> Ai-ris Collier<br><i>Grant / Contract Description:</i> In support of the Reproductive Scientist Development Program Scholar<br><i>Additional Information:</i> |                  | <i>Recipient Type:</i> Individual<br><i>Grant / Contract Purpose:</i> Research  |
| <a href="#">Eunice Kennedy Shriver National Institute of Child Health and Human Development</a>                                                                                      | Grant / Contract | Self                                                                            |
| <i>Recipient Name:</i> Ai-ris Collier<br><i>Grant / Contract Description:</i> Reproductive Scientist Development Program HD000849<br><i>Additional Information:</i>                  |                  | <i>Recipient Type:</i> Individual<br><i>Grant / Contract Purpose:</i> Research  |
| <a href="#">National Institute of Allergy and Infectious Diseases</a>                                                                                                                | Grant / Contract | Self                                                                            |
| <i>Recipient Name:</i> Ai-ris Yonekura Collier, MD<br><i>Grant / Contract Description:</i> R21AI169309<br><i>Additional Information:</i>                                             |                  | <i>Recipient Type:</i> Institution<br><i>Grant / Contract Purpose:</i> Research |

### Additional Questions:

- Are there other relationships or activities that readers could perceive to have influenced, or that give the appearance of potentially influencing, what you wrote in the submitted work?**  
 No.
- What is the manuscript title?**  
 Neutralization Escape by the SARS-CoV-2 Omicron Variants BA.2.12.1 and BA.4/BA.5
- Are you the corresponding author?**  
 No.

### Certification

I certify that the information provided in this disclosure is complete and accurate.

**Disclosure Purpose:** 22-06576

Summary of Interests

I do not have any interests to disclose at this time.

Additional Questions:

- 1. **Are there other relationships or activities that readers could perceive to have influenced, or that give the appearance of potentially influencing, what you wrote in the submitted work?**  
No.
- 2. **What is the manuscript title?**  
Neutralization Escape by the SARS-CoV-2 Omicron Variants BA.2.12.1 and BA.4/BA.5
- 3. **Are you the corresponding author?**  
No.

Certification

I certify that the information provided in this disclosure is complete and accurate.

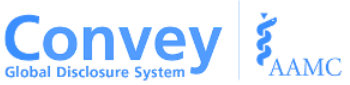

**Disclosure Purpose:** 22-06576

Summary of Interests

I do not have any interests to disclose at this time.

Additional Questions:

- 1. **Are there other relationships or activities that readers could perceive to have influenced, or that give the appearance of potentially influencing, what you wrote in the submitted work?**  
No.
- 2. **What is the manuscript title?**  
Neutralization Escape by the SARS-CoV-2 Omicron Variants BA.2.12.1 and BA.4/BA.5
- 3. **Are you the corresponding author?**  
No.

Certification

I certify that the information provided in this disclosure is complete and accurate.



**Disclosure Purpose:** 22-06576

**Summary of Interests**

I do not have any interests to disclose at this time.

**Additional Questions:**

- 1. **Are there other relationships or activities that readers could perceive to have influenced, or that give the appearance of potentially influencing, what you wrote in the submitted work?**  
No.
- 2. **What is the manuscript title?**  
Neutralization Escape by the SARS-CoV-2 Omicron Variants BA.2.12.1 and BA.4/BA.5
- 3. **Are you the corresponding author?**  
No.

**Certification**

I certify that the information provided in this disclosure is complete and accurate.





**Disclosure Purpose:** 22-06576

**Summary of Interests**

I do not have any interests to disclose at this time.

**Additional Questions:**

- 1. **Are there other relationships or activities that readers could perceive to have influenced, or that give the appearance of potentially influencing, what you wrote in the submitted work?**  
No.
- 2. **What is the manuscript title?**  
Neutralization Escape by the SARS-CoV-2 Omicron Variants BA.2.12.1 and BA.4/BA.5
- 3. **Are you the corresponding author?**  
No.

**Certification**

I certify that the information provided in this disclosure is complete and accurate.



**Disclosure Purpose:** 22-06576

### Summary of Interests

I do not have any interests to disclose at this time.

### Additional Questions:

- Are there other relationships or activities that readers could perceive to have influenced, or that give the appearance of potentially influencing, what you wrote in the submitted work?**  
No.
- What is the manuscript title?**  
Neutralization Escape by the SARS-CoV-2 Omicron Variants BA.2.12.1 and BA.4/BA.5
- Are you the corresponding author?**  
No.

### Certification

I certify that the information provided in this disclosure is complete and accurate.

**Disclosure Purpose:** 22-06576

### Summary of Interests

I do not have any interests to disclose at this time.

### Additional Questions:

- Are there other relationships or activities that readers could perceive to have influenced, or that give the appearance of potentially influencing, what you wrote in the submitted work?**  
No.
- What is the manuscript title?**  
Neutralization Escape by the SARS-CoV-2 Omicron Variants BA.2.12.1 and BA.4/BA.5
- Are you the corresponding author?**  
No.

### Certification

I certify that the information provided in this disclosure is complete and accurate.

**Disclosure Purpose:** 22-06576

Summary of Interests

I do not have any interests to disclose at this time.

Additional Questions:

- 1. **Are there other relationships or activities that readers could perceive to have influenced, or that give the appearance of potentially influencing, what you wrote in the submitted work?**  
No.
- 2. **What is the manuscript title?**  
Neutralization Escape by the SARS-CoV-2 Omicron Variants BA.2.12.1 and BA.4/BA.5
- 3. **Are you the corresponding author?**  
No.

Certification

I certify that the information provided in this disclosure is complete and accurate.



**Disclosure Purpose:** 22-06576

### Summary of Interests

I do not have any interests to disclose at this time.

### Additional Questions:

- Are there other relationships or activities that readers could perceive to have influenced, or that give the appearance of potentially influencing, what you wrote in the submitted work?**  
No.
- What is the manuscript title?**  
Neutralization Escape by the SARS-CoV-2 Omicron Variants BA.2.12.1 and BA.4/BA.5
- Are you the corresponding author?**  
No.

### Certification

I certify that the information provided in this disclosure is complete and accurate.
